# Supplementary material for: Dysregulated expression levels of APH1B in peripheral blood are associated with brain atrophy and amyloid-β deposition in Alzheimer’s disease
Source: PubMed Central journal article supplement (PMC8567578; doi:10.1186/s13195-021-00919-z), 2021-11-03
Supplement: 13195_2021_919_MOESM1_ESM.pdf [file 13195_2021_919_MOESM1_ESM.pdf]

**Supplementary Table 1. Blood eQTL data generated from GWAS genotyping and blood-based RNA expression data in ADNI**

| Chr | SNP         | A1 | A2 | MAF        | $Z_{GWAS}$ | $P_{GWAS}$             | Transcript ID | Gene            | $T_{eQTL}$ | $P_{eQTL}$             | FDR-corrected $P_{eQTL}$ |
|-----|-------------|----|----|------------|------------|------------------------|---------------|-----------------|------------|------------------------|--------------------------|
| 1   | rs4575098   | A  | G  | 0.228026   | 6.35743578 | $2.05 \times 10^{-10}$ | 11760705_a_at | <i>NDUFS2</i>   | -4.0452694 | $5.85 \times 10^{-5}$  | $1.68 \times 10^{-3}$    |
| 1   | rs4575098   | A  | G  | 0.228026   | 6.35743578 | $2.05 \times 10^{-10}$ | 11730923_x_at | <i>ADAMTS4</i>  | -3.4327928 | $6.35 \times 10^{-4}$  | $1.48 \times 10^{-2}$    |
| 1   | rs4575098   | A  | G  | 0.228026   | 6.35743578 | $2.05 \times 10^{-10}$ | 11718419_at   | <i>FCER1G</i>   | -3.1782706 | $1.55 \times 10^{-3}$  | $3.09 \times 10^{-2}$    |
| 1   | rs2093760   | A  | G  | 0.191962   | 8.82495729 | $1.10 \times 10^{-18}$ | 11760294_a_at | <i>CD55</i>     | -3.2667773 | $1.14 \times 10^{-3}$  | $2.46 \times 10^{-2}$    |
| 2   | rs4663105   | C  | A  | 0.411349   | 13.9449582 | $3.38 \times 10^{-44}$ | 11746895_a_at | <i>BINI</i>     | 5.42234123 | $8.27 \times 10^{-8}$  | $3.30 \times 10^{-6}$    |
| 2   | rs4663105   | C  | A  | 0.411349   | 13.9449582 | $3.38 \times 10^{-44}$ | 11741810_x_at | <i>BINI</i>     | 5.67610177 | $2.07 \times 10^{-8}$  | $9.63 \times 10^{-7}$    |
| 2   | rs4663105   | C  | A  | 0.411349   | 13.9449582 | $3.38 \times 10^{-44}$ | 11757435_x_at | <i>BINI</i>     | 5.67600123 | $2.07 \times 10^{-8}$  | $9.63 \times 10^{-7}$    |
| 2   | rs4663105   | C  | A  | 0.411349   | 13.9449582 | $3.38 \times 10^{-44}$ | 11719631_s_at | <i>BINI</i>     | 6.08815733 | $1.94 \times 10^{-9}$  | $1.28 \times 10^{-7}$    |
| 3   | rs184384746 | T  | C  | 0.00110872 | 5.69454687 | $1.24 \times 10^{-8}$  | 11715428_x_at | <i>ARF4</i>     | 3.36531377 | $8.09 \times 10^{-4}$  | $1.84 \times 10^{-2}$    |
| 6   | rs6931277   | T  | A  | 0.156437   | -6.4930489 | $8.41 \times 10^{-11}$ | 11740691_x_at | <i>AIF1</i>     | 3.81204871 | $1.51 \times 10^{-4}$  | $3.92 \times 10^{-3}$    |
| 6   | rs6931277   | T  | A  | 0.156437   | -6.4930489 | $8.41 \times 10^{-11}$ | 11731019_x_at | <i>AIF1</i>     | 3.32915398 | $9.20 \times 10^{-4}$  | $2.05 \times 10^{-2}$    |
| 6   | rs6931277   | T  | A  | 0.156437   | -6.4930489 | $8.41 \times 10^{-11}$ | 11745266_x_at | <i>TAP2</i>     | -6.3677094 | $3.60 \times 10^{-10}$ | $2.88 \times 10^{-8}$    |
| 6   | rs6931277   | T  | A  | 0.156437   | -6.4930489 | $8.41 \times 10^{-11}$ | 11741632_a_at | <i>TAP2</i>     | -5.9088386 | $5.53 \times 10^{-9}$  | $2.94 \times 10^{-7}$    |
| 6   | rs6931277   | T  | A  | 0.156437   | -6.4930489 | $8.41 \times 10^{-11}$ | 11723059_a_at | <i>TAP2</i>     | -3.1609819 | $1.64 \times 10^{-3}$  | $3.17 \times 10^{-2}$    |
| 6   | rs6931277   | T  | A  | 0.156437   | -6.4930489 | $8.41 \times 10^{-11}$ | 11723058_a_at | <i>TAP2</i>     | -6.5032296 | $1.56 \times 10^{-10}$ | $1.34 \times 10^{-8}$    |
| 6   | rs6931277   | T  | A  | 0.156437   | -6.4930489 | $8.41 \times 10^{-11}$ | 11759642_x_at | <i>HLA-DRB1</i> | -3.9407455 | $8.99 \times 10^{-5}$  | $2.51 \times 10^{-3}$    |
| 7   | rs1859788   | A  | G  | 0.32433    | -7.9282106 | $2.22 \times 10^{-15}$ | 11755835_s_at | <i>GATS</i>     | 3.18361271 | $1.52 \times 10^{-3}$  | $3.09 \times 10^{-2}$    |
| 7   | rs1859788   | A  | G  | 0.32433    | -7.9282106 | $2.22 \times 10^{-15}$ | 11722909_a_at | <i>GATS</i>     | 10.3419453 | $2.50 \times 10^{-23}$ | $4.66 \times 10^{-21}$   |
| 7   | rs1859788   | A  | G  | 0.32433    | -7.9282106 | $2.22 \times 10^{-15}$ | 11756508_a_at | <i>TAF6</i>     | -3.2251348 | $1.32 \times 10^{-3}$  | $2.79 \times 10^{-2}$    |
| 7   | rs1859788   | A  | G  | 0.32433    | -7.9282106 | $2.22 \times 10^{-15}$ | 11749146_x_at | <i>TAF6</i>     | -3.7481712 | $1.94 \times 10^{-4}$  | $4.92 \times 10^{-3}$    |
| 7   | rs1859788   | A  | G  | 0.32433    | -7.9282106 | $2.22 \times 10^{-15}$ | 11728725_x_at | <i>TAF6</i>     | -3.0149441 | $2.67 \times 10^{-3}$  | $4.97 \times 10^{-2}$    |
| 7   | rs1859788   | A  | G  | 0.32433    | -7.9282106 | $2.22 \times 10^{-15}$ | 11721727_x_at | <i>TAF6</i>     | -3.8152085 | $1.49 \times 10^{-4}$  | $3.92 \times 10^{-3}$    |
| 7   | rs1859788   | A  | G  | 0.32433    | -7.9282106 | $2.22 \times 10^{-15}$ | 11730247_a_at | <i>PVRIG</i>    | 4.6251114  | $4.51 \times 10^{-6}$  | $1.40 \times 10^{-4}$    |
| 7   | rs1859788   | A  | G  | 0.32433    | -7.9282106 | $2.22 \times 10^{-15}$ | 11736389_x_at | <i>TRIM4</i>    | -5.9689044 | $3.91 \times 10^{-9}$  | $2.28 \times 10^{-7}$    |
| 7   | rs1859788   | A  | G  | 0.32433    | -7.9282106 | $2.22 \times 10^{-15}$ | 11736388_a_at | <i>TRIM4</i>    | -5.9612934 | $4.08 \times 10^{-9}$  | $2.28 \times 10^{-7}$    |

|    |                 |   |   |          |            |                        |               |         |            |                        |                        |
|----|-----------------|---|---|----------|------------|------------------------|---------------|---------|------------|------------------------|------------------------|
| 7  | rs1859788       | A | G | 0.32433  | -7.9282106 | $2.22 \times 10^{-15}$ | 11732427_a_at | ZCWPW1  | 3.16076728 | $1.65 \times 10^{-3}$  | $3.17 \times 10^{-2}$  |
| 7  | rs1859788       | A | G | 0.32433  | -7.9282106 | $2.22 \times 10^{-15}$ | 11760666_x_at | ZKSCAN1 | 4.86984486 | $1.40 \times 10^{-6}$  | $4.89 \times 10^{-5}$  |
| 7  | rs1859788       | A | G | 0.32433  | -7.9282106 | $2.22 \times 10^{-15}$ | 11760665_at   | ZKSCAN1 | 5.46541079 | 6.56E-08               | $2.72 \times 10^{-6}$  |
| 7  | rs1859788       | A | G | 0.32433  | -7.9282106 | $2.22 \times 10^{-15}$ | 11732213_x_at | ZKSCAN1 | -3.3226381 | $9.41 \times 10^{-4}$  | $2.06 \times 10^{-2}$  |
| 7  | rs7810606       | T | C | 0.485387 | -6.6200683 | $3.59 \times 10^{-11}$ | 11723373_a_at | EPHA1   | 4.7393005  | $2.63 \times 10^{-6}$  | $8.90 \times 10^{-5}$  |
| 11 | rs2081545       | A | C | 0.382122 | -7.9728583 | $1.55 \times 10^{-15}$ | 11760710_a_at | MS4A6A  | -4.7160648 | $2.94 \times 10^{-6}$  | $9.65 \times 10^{-5}$  |
| 11 | rs2081545       | A | C | 0.382122 | -7.9728583 | $1.55 \times 10^{-15}$ | 11749293_x_at | MS4A6A  | -10.840538 | $2.64 \times 10^{-25}$ | $5.91 \times 10^{-23}$ |
| 11 | rs2081545       | A | C | 0.382122 | -7.9728583 | $1.55 \times 10^{-15}$ | 11716846_a_at | MS4A6A  | -11.296622 | $3.63 \times 10^{-27}$ | $1.35 \times 10^{-24}$ |
| 11 | rs2081545       | A | C | 0.382122 | -7.9728583 | $1.55 \times 10^{-15}$ | 11732866_x_at | MS4A4A  | -5.8223336 | $9.08 \times 10^{-9}$  | $4.61 \times 10^{-7}$  |
| 11 | rs2081545       | A | C | 0.382122 | -7.9728583 | $1.55 \times 10^{-15}$ | 11732865_a_at | MS4A4A  | -5.5375868 | $4.44 \times 10^{-8}$  | $1.98 \times 10^{-6}$  |
| 11 | rs2081545       | A | C | 0.382122 | -7.9728583 | $1.55 \times 10^{-15}$ | 11751570_a_at | MS4A4A  | -6.0298488 | $2.74 \times 10^{-9}$  | $1.70 \times 10^{-7}$  |
| 14 | rs12590654      | A | G | 0.33648  | -6.3912394 | $1.65 \times 10^{-10}$ | 11735593_a_at | SLC24A4 | 5.52351067 | $4.79 \times 10^{-8}$  | $2.06 \times 10^{-6}$  |
| 14 | rs12590654      | A | G | 0.33648  | -6.3912394 | $1.65 \times 10^{-10}$ | 11735594_a_at | SLC24A4 | 4.61336689 | $4.76 \times 10^{-6}$  | $1.44 \times 10^{-4}$  |
| 15 | rs442495        | C | T | 0.354342 | -6.065891  | $1.31 \times 10^{-9}$  | 11730885_a_at | FAM63B  | 5.30470232 | $1.54 \times 10^{-7}$  | $5.75 \times 10^{-6}$  |
| 15 | rs442495        | C | T | 0.354342 | -6.065891  | $1.31 \times 10^{-9}$  | 11755773_x_at | FAM63B  | 5.37386384 | $1.07 \times 10^{-7}$  | $4.13 \times 10^{-6}$  |
| 15 | rs11761801<br>7 | T | C | 0.124823 | 5.52218674 | $3.35 \times 10^{-8}$  | 11740603_a_at | APH1B   | 6.87148987 | $1.48 \times 10^{-11}$ | $1.38 \times 10^{-9}$  |
| 15 | rs11761801<br>7 | T | C | 0.124823 | 5.52218674 | $3.35 \times 10^{-8}$  | 11740601_a_at | APH1B   | 6.25273694 | $7.26 \times 10^{-10}$ | $5.41 \times 10^{-8}$  |
| 15 | rs11761801<br>7 | T | C | 0.124823 | 5.52218674 | $3.35 \times 10^{-8}$  | 11720067_a_at | APH1B   | 6.10180361 | $1.79 \times 10^{-9}$  | $1.25 \times 10^{-7}$  |
| 15 | rs11761801<br>7 | T | C | 0.124823 | 5.52218674 | $3.35 \times 10^{-8}$  | 11720068_a_at | APH1B   | 7.21238813 | $1.52 \times 10^{-12}$ | $1.54 \times 10^{-10}$ |
| 15 | rs11761801<br>7 | T | C | 0.124823 | 5.52218674 | $3.35 \times 10^{-8}$  | 11740602_s_at | APH1B   | 7.43713411 | $3.23 \times 10^{-13}$ | $4.00 \times 10^{-11}$ |
| 16 | rs59735493      | A | G | 0.298476 | -5.4919099 | $3.98 \times 10^{-8}$  | 11723657_a_at | ZNF668  | -3.649139  | $2.84 \times 10^{-4}$  | $6.90 \times 10^{-3}$  |
| 17 | rs11326053<br>1 | A | G | 0.126086 | 6.12333064 | $9.16 \times 10^{-10}$ | 11748594_a_at | RABEP1  | -8.9138946 | $4.82 \times 10^{-18}$ | $7.70 \times 10^{-16}$ |
| 17 | rs11326053<br>1 | A | G | 0.126086 | 6.12333064 | $9.16 \times 10^{-10}$ | 11718616_s_at | RABEP1  | 8.84651459 | 8.31E-18               | $1.16 \times 10^{-15}$ |

|    |                 |   |   |               |            |                        |               |                |            |                        |                        |
|----|-----------------|---|---|---------------|------------|------------------------|---------------|----------------|------------|------------------------|------------------------|
| 17 | rs11326053<br>1 | A | G | 0.126086      | 6.12333064 | $9.16 \times 10^{-10}$ | 11735601_at   | <i>CHRNE</i>   | 3.83501354 | $1.38 \times 10^{-4}$  | $3.75 \times 10^{-3}$  |
| 17 | rs11326053<br>1 | A | G | 0.126086      | 6.12333064 | $9.16 \times 10^{-10}$ | 11722495_a_at | <i>MYBBP1A</i> | -3.0364818 | $2.49 \times 10^{-3}$  | $4.71 \times 10^{-2}$  |
| 17 | rs11326053<br>1 | A | G | 0.126086      | 6.12333064 | $9.16 \times 10^{-10}$ | 11722554_at   | <i>NUP88</i>   | -3.5512468 | $4.11 \times 10^{-4}$  | $9.76 \times 10^{-3}$  |
| 17 | rs11326053<br>1 | A | G | 0.126086      | 6.12333064 | $9.16 \times 10^{-10}$ | 11747065_x_at | <i>NUP88</i>   | -4.1539448 | $3.70 \times 10^{-5}$  | $1.09 \times 10^{-3}$  |
| 17 | rs11326053<br>1 | A | G | 0.126086      | 6.12333064 | $9.16 \times 10^{-10}$ | 11732435_at   | <i>SCIMP</i>   | 3.73900931 | $2.01 \times 10^{-4}$  | $4.99 \times 10^{-3}$  |
| 19 | rs11127889<br>2 | G | C | 0.147136      | 6.50193146 | $7.93 \times 10^{-11}$ | 11746548_s_at | <i>CNN2</i>    | -7.2762348 | $9.85 \times 10^{-13}$ | $1.10 \times 10^{-10}$ |
| 19 | rs11127889<br>2 | G | C | 0.147136      | 6.50193146 | $7.93 \times 10^{-11}$ | 11723416_x_at | <i>CNN2</i>    | 11.1991128 | $9.17 \times 10^{-27}$ | $2.56 \times 10^{-24}$ |
| 19 | rs11127889<br>2 | G | C | 0.147136      | 6.50193146 | $7.93 \times 10^{-11}$ | 11723414_a_at | <i>CNN2</i>    | 12.0514456 | $2.33 \times 10^{-30}$ | $1.30 \times 10^{-27}$ |
| 19 | rs11127889<br>2 | G | C | 0.147136      | 6.50193146 | $7.93 \times 10^{-11}$ | 11723415_s_at | <i>CNN2</i>    | 13.2170534 | $1.56 \times 10^{-35}$ | $1.74 \times 10^{-32}$ |
| 20 | rs6014724       | G | A | 0.095041<br>6 | -6.1762414 | $6.56 \times 10^{-10}$ | 11739100_a_at | <i>CSTF1</i>   | -4.6308011 | $4.39 \times 10^{-6}$  | $1.40 \times 10^{-4}$  |
| 20 | rs6014724       | G | A | 0.095041<br>6 | -6.1762414 | $6.56 \times 10^{-10}$ | 11741029_x_at | <i>CSTF1</i>   | -5.2978528 | $1.60 \times 10^{-7}$  | $5.77 \times 10^{-6}$  |
| 20 | rs6014724       | G | A | 0.095041<br>6 | -6.1762414 | $6.56 \times 10^{-10}$ | 11718943_a_at | <i>AURKA</i>   | -3.1969674 | $1.46 \times 10^{-3}$  | $3.01 \times 10^{-2}$  |

Abbreviations: A1: minor allele; A2: major allele; ADNI: Alzheimer's Disease Neuroimaging Initiative; Chr: chromosome; eQTL: expression quantitative trait loci; FDR: false discovery rate; GWAS: genome-wide association studies; MAF: minor allele frequency;  $P_{eQTL}$ :  $P$ -value of eQTL analysis;  $P_{GWAS}$ :  $P$ -value of GWAS; SNP: single nucleotide polymorphism;  $T_{eQTL}$ :  $T$ -value of eQTL analysis; Transcript ID: transcript identifier of Affymetrix Human Genome U219 Array;  $Z_{GWAS}$ :  $Z$ -value of GWAS

**Supplementary Table 2. Blood eQTL data generated from GWAS genotyping and blood-based RNA expression data in AddNeuroMed**

| Chr | SNP         | A1 | A2 | MAF       | $Z_{GWAS}$ | $P_{GWAS}$             | Transcript ID | Gene            | $T_{eQTL}$ | $P_{eQTL}$             | FDR-corrected $P_{eQTL}$ |
|-----|-------------|----|----|-----------|------------|------------------------|---------------|-----------------|------------|------------------------|--------------------------|
| 1   | rs4575098   | A  | G  | 0.228026  | 6.35743578 | $2.05 \times 10^{-10}$ | ILMN_2123743  | <i>FCER1G</i>   | -5.51947   | $5.64 \times 10^{-8}$  | $5.13 \times 10^{-6}$    |
| 1   | rs4575098   | A  | G  | 0.228026  | 6.35743578 | $2.05 \times 10^{-10}$ | ILMN_1658383  | <i>HSPA6</i>    | -3.0937678 | $2.09 \times 10^{-3}$  | $3.57 \times 10^{-2}$    |
| 2   | rs4663105   | C  | A  | 0.411349  | 13.9449582 | $3.38 \times 10^{-44}$ | ILMN_1674160  | <i>BINI</i>     | 4.3979003  | $1.35 \times 10^{-5}$  | $5.22 \times 10^{-4}$    |
| 2   | rs4663105   | C  | A  | 0.411349  | 13.9449582 | $3.38 \times 10^{-44}$ | ILMN_2309245  | <i>BINI</i>     | 3.316668   | $9.82 \times 10^{-4}$  | $2.06 \times 10^{-2}$    |
| 6   | rs6931277   | T  | A  | 0.156437  | -6.4930489 | $8.41 \times 10^{-11}$ | ILMN_1808405  | <i>HLA-DQA1</i> | 8.42798982 | $4.35 \times 10^{-16}$ | $1.19 \times 10^{-13}$   |
| 6   | rs6931277   | T  | A  | 0.156437  | -6.4930489 | $8.41 \times 10^{-11}$ | ILMN_2157441  | <i>HLA-DRA</i>  | -4.3701113 | $1.53 \times 10^{-5}$  | $5.22 \times 10^{-4}$    |
| 6   | rs6931277   | T  | A  | 0.156437  | -6.4930489 | $8.41 \times 10^{-11}$ | ILMN_1774074  | <i>RXRΒ</i>     | 3.10664257 | $2.01 \times 10^{-3}$  | $3.57 \times 10^{-2}$    |
| 7   | rs1859788   | A  | G  | 0.32433   | -7.9282106 | $2.22 \times 10^{-15}$ | ILMN_1699631  | <i>GATS</i>     | 7.86935366 | $2.49 \times 10^{-14}$ | 3.39E-12                 |
| 7   | rs1859788   | A  | G  | 0.32433   | -7.9282106 | $2.22 \times 10^{-15}$ | ILMN_1768754  | <i>PILRB</i>    | -4.4400456 | $1.12 \times 10^{-5}$  | $5.11 \times 10^{-4}$    |
| 7   | rs1859788   | A  | G  | 0.32433   | -7.9282106 | $2.22 \times 10^{-15}$ | ILMN_2323385  | <i>TRIM4</i>    | 3.19269627 | $1.50 \times 10^{-3}$  | $2.93 \times 10^{-2}$    |
| 11  | rs2081545   | A  | C  | 0.382122  | -7.9728583 | $1.55 \times 10^{-15}$ | ILMN_1721035  | <i>MS4A6A</i>   | -4.7802007 | $2.35 \times 10^{-6}$  | $1.28 \times 10^{-4}$    |
| 11  | rs2081545   | A  | C  | 0.382122  | -7.9728583 | $1.55 \times 10^{-15}$ | ILMN_2359800  | <i>MS4A6A</i>   | -3.9721891 | $8.24 \times 10^{-5}$  | $2.25 \times 10^{-3}$    |
| 15  | rs117618017 | T  | C  | 0.124823  | 5.52218674 | $3.35 \times 10^{-8}$  | ILMN_1767816  | <i>APH1B</i>    | 4.1199093  | $4.48 \times 10^{-5}$  | $1.36 \times 10^{-3}$    |
| 16  | rs59735493  | A  | G  | 0.298476  | -5.4919099 | $3.98 \times 10^{-8}$  | ILMN_2254635  | <i>ITGAX</i>    | -3.519294  | $4.75 \times 10^{-4}$  | $1.18 \times 10^{-2}$    |
| 17  | rs113260531 | A  | G  | 0.126086  | 6.12333064 | $9.16 \times 10^{-10}$ | ILMN_1719622  | <i>RABEP1</i>   | 5.27089797 | $2.07 \times 10^{-7}$  | $1.42 \times 10^{-5}$    |
| 19  | rs76320948  | T  | C  | 0.0307669 | 5.46447952 | $4.64 \times 10^{-8}$  | ILMN_2369785  | <i>SNRPD2</i>   | -3.3724035 | $8.07 \times 10^{-4}$  | $1.84 \times 10^{-2}$    |
| 19  | rs76320948  | T  | C  | 0.0307669 | 5.46447952 | $4.64 \times 10^{-8}$  | ILMN_1665831  | <i>CLPTM1</i>   | 2.98652997 | $2.97 \times 10^{-3}$  | $4.77 \times 10^{-2}$    |

Abbreviations: A1: minor allele; A2: major allele; Chr: chromosome; eQTL: expression quantitative trait loci; FDR: false discovery rate; GWAS: genome-wide association studies; MAF: minor allele frequency;  $P_{eQTL}$ :  $P$ -value of eQTL analysis;  $P_{GWAS}$ :  $P$ -value of GWAS; SNP: single nucleotide polymorphism;  $T_{eQTL}$ :  $T$ -value of eQTL analysis; Transcript ID: transcript identifier of Illumina Human HT-12 v3 Expression BeadChips;  $Z_{GWAS}$ :  $Z$ -value of GWAS

**Supplementary Table 3. Results of differential gene expression analysis between AD, MCI and CN in ADNI**

| Transcript ID | Gene          | $T_{MCI}$  | $P_{MCI}$  | FDR-corrected<br>$P_{MCI}$ | $T_{AD}$   | $P_{AD}$   | FDR-corrected<br>$P_{AD}$ |
|---------------|---------------|------------|------------|----------------------------|------------|------------|---------------------------|
| 11720068 a at | <i>APHIB</i>  | 2.37950761 | 0.01762073 | 0.16739694                 | 3.60610847 | 0.00033443 | 0.00635408                |
| 11740603 a at | <i>APHIB</i>  | 2.10584783 | 0.03559698 | 0.22544756                 | 3.16482438 | 0.00162355 | 0.01542369                |
| 11716846 a at | <i>MS4A6A</i> | 1.1665279  | 0.24382497 | 0.71737066                 | 2.30155332 | 0.02167287 | 0.1167574                 |
| 11741810 x at | <i>BINI</i>   | -0.5361022 | 0.59206965 | 0.71737066                 | -2.2336531 | 0.02584223 | 0.1167574                 |
| 11719631 s at | <i>BINI</i>   | -1.4925036 | 0.13604792 | 0.51698209                 | -2.1331814 | 0.03328033 | 0.1167574                 |
| 11757435 x at | <i>BINI</i>   | -1.7392231 | 0.0824646  | 0.39170684                 | -2.0914613 | 0.03687076 | 0.1167574                 |
| 11746895 a at | <i>BINI</i>   | -0.5659524 | 0.5716197  | 0.71737066                 | -1.8577023 | 0.06365917 | 0.17278917                |
| 11755835 s at | <i>GATS</i>   | 3.08088286 | 0.00215024 | 0.04085449                 | 1.64800038 | 0.09983143 | 0.23709964                |
| 11749293_x_at | <i>MS4A6A</i> | 0.93342924 | 0.35094182 | 0.71737066                 | 1.46129947 | 0.14441209 | 0.30486997                |
| 11722909 a at | <i>GATS</i>   | 0.80371346 | 0.42185361 | 0.71737066                 | 1.37139168 | 0.17072179 | 0.3243714                 |
| 11748594 a at | <i>RABEP1</i> | -1.0805145 | 0.28031023 | 0.71737066                 | -1.2710846 | 0.20414909 | 0.35262115                |
| 11760710 a at | <i>MS4A6A</i> | 0.22731267 | 0.82025144 | 0.86582097                 | 1.1901364  | 0.23442331 | 0.37117024                |
| 11718419 at   | <i>FCER1G</i> | -0.0111897 | 0.99107547 | 0.99107547                 | 1.06608133 | 0.28677908 | 0.41913866                |
| 11720067 a at | <i>APHIB</i>  | -0.3513944 | 0.72540528 | 0.81074708                 | 0.47572597 | 0.63442799 | 0.80384508                |
| 11718616 s at | <i>RABEP1</i> | -0.6529023 | 0.51404833 | 0.71737066                 | -0.4754644 | 0.63461453 | 0.80384508                |
| 11736388 a at | <i>TRIM4</i>  | -0.5187621 | 0.60410161 | 0.71737066                 | 0.2555444  | 0.79838276 | 0.94807953                |
| 11740601 a at | <i>APHIB</i>  | -0.7431566 | 0.45765291 | 0.71737066                 | 0.10536262 | 0.91612029 | 0.95095326                |
| 11736389 x at | <i>TRIM4</i>  | -0.8272241 | 0.40841083 | 0.71737066                 | 0.06291794 | 0.94985102 | 0.95095326                |
| 11740602 s at | <i>APHIB</i>  | -0.8946098 | 0.3713238  | 0.71737066                 | 0.06153327 | 0.95095326 | 0.95095326                |

$T$  value and  $P$  values were obtained from analysis of covariance for diagnosis group (CN, MCI and AD) with adjustment of age and sex.

Abbreviations: AD: Alzheimer's disease; ADNI: Alzheimer's Disease Neuroimaging Initiative; CN: cognitively normal older adults; FDR: false discovery rate; MCI: mild cognitive impairment;  $P_{AD}$ :  $P$ -value for AD diagnosis;  $P_{MCI}$ :  $P$ -value for MCI diagnosis;  $T_{AD}$ :  $T$ -value for AD diagnosis;  $T_{MCI}$ :  $T$ -value for MCI diagnosis; Transcript ID: transcript identifier of Affymetrix Human Genome U219 Array
