# Supplementary material for: Dysregulated expression levels of APH1B in peripheral blood are associated with brain atrophy and amyloid-β deposition in Alzheimer’s disease
Source: PubMed Central journal article supplement (PMC8567578; doi:10.1186/s13195-021-00919-z), 2021-11-03

**Supplementary Figure 1. GWAS quality control procedures for samples in the Alzheimer's Disease Neuroimaging Initiative cohort**

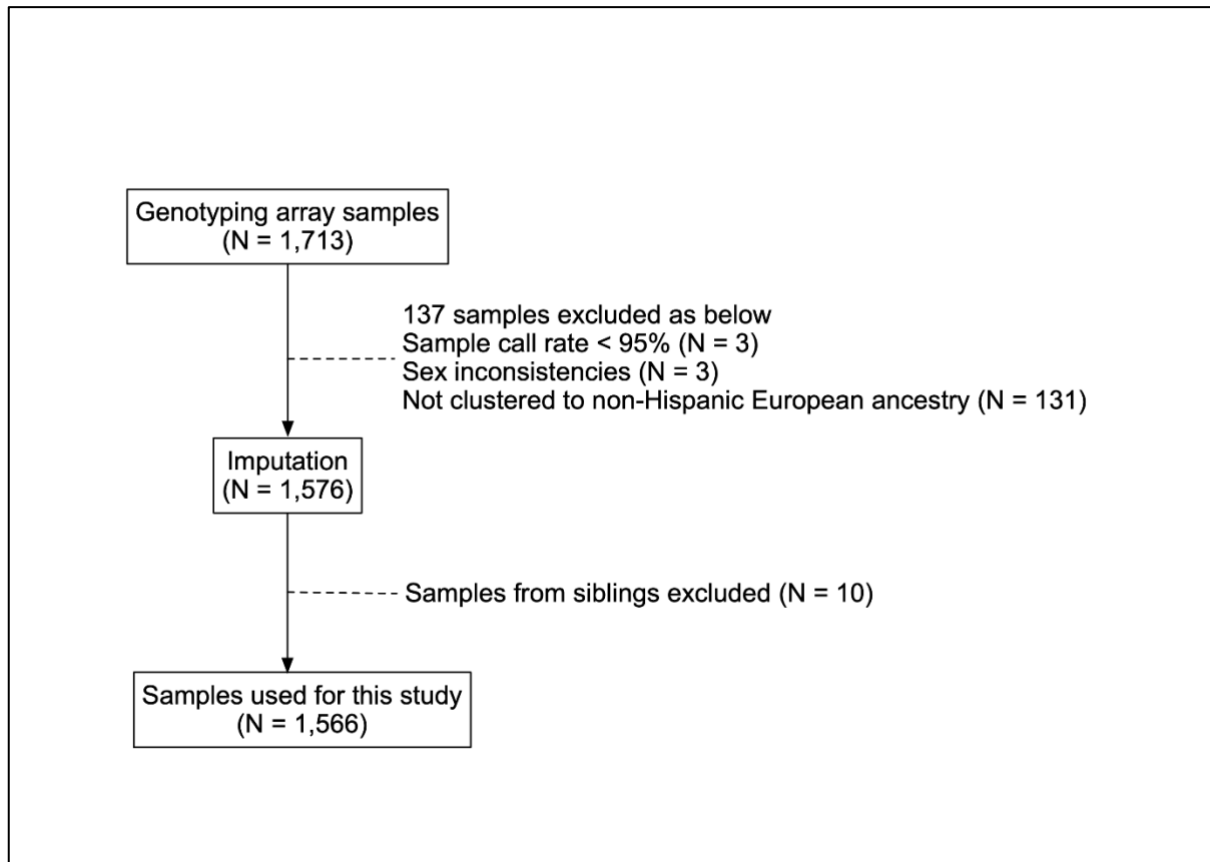

Abbreviation: GWAS: genome-wide association study.

**Supplementary Figure 2. Quality control procedures of mRNA expression data for samples in the Alzheimer's Disease Neuroimaging Initiative cohort**

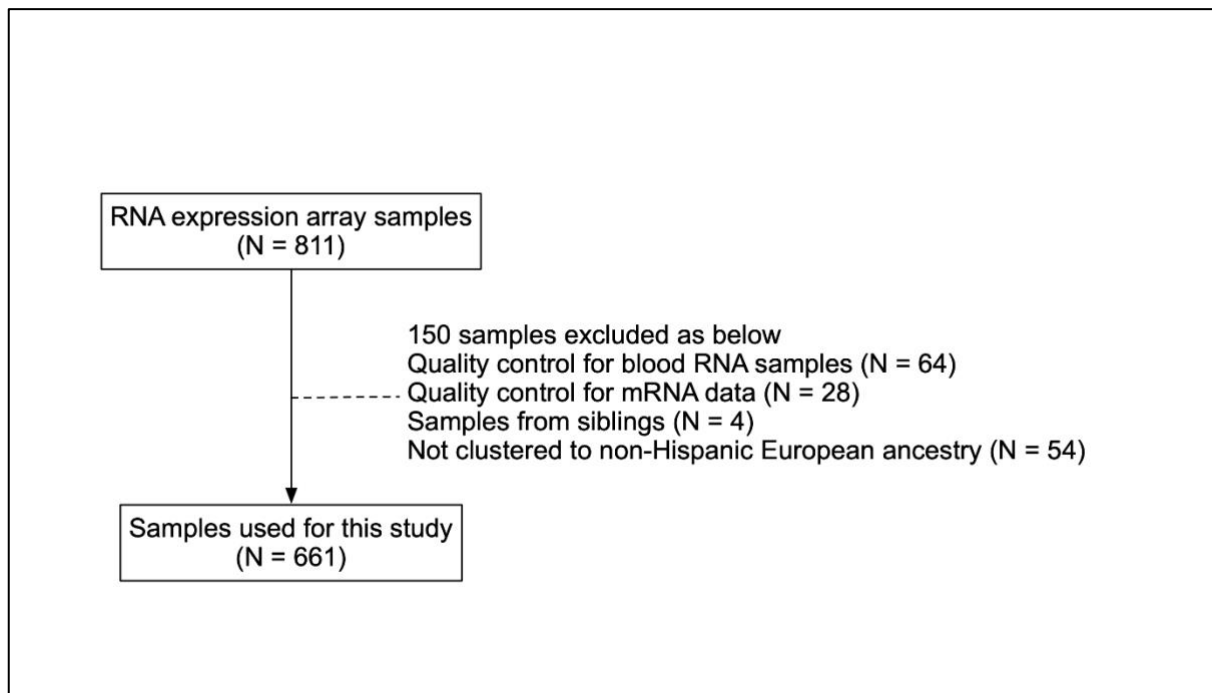

Supplement: 13195_2021_919_MOESM2_ESM.pdf [file 13195_2021_919_MOESM2_ESM.pdf]
